# Supplementary material
Source: Springer Nature journal article supplement (https://www.springermedizin.de/resource/supplementary/12950_2011_291_MOESM7_ESM.pdf/9557478)

**A**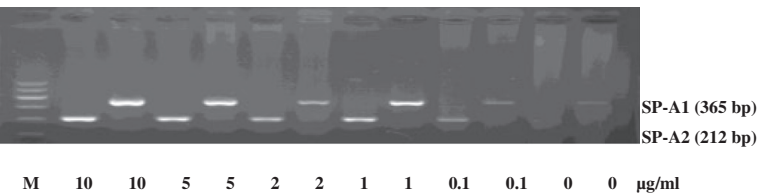**B**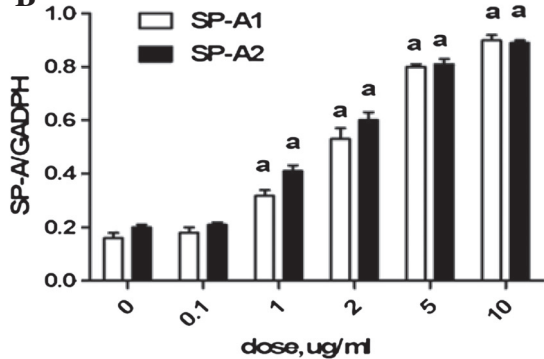**C**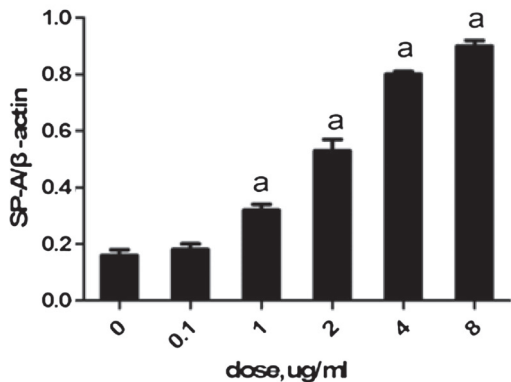

Supplement: MOESM7 [file 9557478]
